# Supplementary material
Source: ML conference proceedings conference paper supplement (https://www.ecva.net/papers/eccv_2020/papers_ECCV/html/123540664_ECCV_2020_paper.php)
Supplement: Supplementary file 1 [file 123540664-supp.zip]

# Leveraging Semi-Supervised Learning in Video Sequences for Urban Scene Segmentation

## – Supplementary Material –

Anonymous ECCV submission

Paper ID 942

**Pseudo-Labeled Video Sequences:** We visualize the generated pseudo-labeled sequences at iteration 1 and iteration 2 for a short video sequence from train-sequence set. For each second, we visualize the input image (left), pseudo-labels at iteration 1 (Teacher with X-71), and pseudo-labels at iteration 2 (Teacher with WR-41). We also overlay the pseudo-labels with images.

**Architecture of proposed WR-41:** In Tab. 1, we provide the architecture details of WR-38 [1] and our proposed WR-41.

| layer name | input size       | output size      | WR-38 [1]                                                                                         | WR-41                                                                                            |
|------------|------------------|------------------|---------------------------------------------------------------------------------------------------|--------------------------------------------------------------------------------------------------|
| conv1      | $224 \times 224$ | $224 \times 224$ | $3 \times 3, 64$                                                                                  |                                                                                                  |
| B2         | $224 \times 224$ | $112 \times 112$ | $\begin{bmatrix} 3 \times 3, 128 \\ 3 \times 3, 128 \end{bmatrix} \times 3$                       | $\begin{bmatrix} 3 \times 3, 128 \\ 3 \times 3, 128 \end{bmatrix} \times 3$                      |
| B3         | $112 \times 112$ | $56 \times 56$   | $\begin{bmatrix} 3 \times 3, 256 \\ 3 \times 3, 256 \end{bmatrix} \times 3$                       | $\begin{bmatrix} 3 \times 3, 256 \\ 3 \times 3, 256 \end{bmatrix} \times 3$                      |
| B4         | $56 \times 56$   | $28 \times 28$   | $\begin{bmatrix} 3 \times 3, 512 \\ 3 \times 3, 512 \end{bmatrix} \times 6$                       | $\begin{bmatrix} 3 \times 3, 512 \\ 3 \times 3, 512 \end{bmatrix} \times 6$                      |
| B5         | $28 \times 28$   | $14 \times 14$   | $\begin{bmatrix} 3 \times 3, 512 \\ 3 \times 3, 1024 \end{bmatrix} \times 3$                      | $\begin{bmatrix} 3 \times 3, 512 \\ 3 \times 3, 1024 \end{bmatrix} \times 3$                     |
| B6         | $14 \times 14$   | $7 \times 7$     | $\begin{bmatrix} 1 \times 1, 512 \\ 3 \times 3, 1024 \\ 1 \times 1, 2048 \end{bmatrix} \times 1$  | $\begin{bmatrix} 1 \times 1, 512 \\ 3 \times 3, 1024 \\ 1 \times 1, 2048 \end{bmatrix} \times 3$ |
| B7         | $7 \times 7$     | $7 \times 7$     | $\begin{bmatrix} 1 \times 1, 1024 \\ 3 \times 3, 2048 \\ 1 \times 1, 4096 \end{bmatrix} \times 1$ |                                                                                                  |
|            | $7 \times 7$     | $1 \times 1$     | average pool, 1000-d fc, softmax                                                                  |                                                                                                  |
| Params (M) |                  |                  | 109                                                                                               | 111                                                                                              |
| M-Adds (B) |                  |                  | 46                                                                                                | 49.3                                                                                             |

**Table 1.** Architectures for WR-38 [1] and our proposed WR-41 on ImageNet. The M-Adds are computed w.r.t. an  $224 \times 224$  input.

## References

- Wu, Z., Shen, C., Van Den Hengel, A.: Wider or deeper: Revisiting the resnet model for visual recognition. Pattern Recognition (2019) 1
